# Supplementary material
Source: ML conference proceedings conference paper supplement (https://proceedings.neurips.cc/paper_files/paper/2022/hash/5f9f9e4da57a94547491a39dc18f1696-Abstract.html)
Supplement: Supplementary file 1 [file 5f9f9e4da57a94547491a39dc18f1696-Supplemental-Conference.zip]

Archive with 7 entries (6 files):
- Supplementary/
- Supplementary/.DS_Store
- __MACOSX/Supplementary/._.DS_Store
- Supplementary/LF_MLF_Appendix.pdf
- __MACOSX/Supplementary/._LF_MLF_Appendix.pdf
- Supplementary/code.zip
- __MACOSX/Supplementary/._code.zip
